# Supplementary material for: Genetic Analysis of PLA2G6 in 22 Indian Families with Infantile Neuroaxonal Dystrophy, Atypical Late-Onset Neuroaxonal Dystrophy and Dystonia Parkinsonism Complex
Source: PubMed Central journal article supplement (PMC4873246; doi:10.1371/journal.pone.0155605), 2016-05-19
Supplement: pone.0155605.s001.pdf [file pone.0155605.s001.pdf]

**File S1:** Supporting multiple Figures and Tables

**Genetic analysis of *PLA2G6* in 22 Indian families with infantile neuroaxonal dystrophy, atypical late-onset neuroaxonal dystrophy and dystonia parkinsonism complex**

Saketh Kapoor<sup>1¶</sup>, Mohd Hussain Shah<sup>1¶</sup>, Nivedita Singh<sup>1¶</sup>, Mohammad Iqbal Rather<sup>1</sup>, Vishwanath Bhat<sup>1</sup>, Sindhura Gopinath<sup>2</sup>, Parayil Sankaran Bindu<sup>3\*</sup>, Arun B. Taly<sup>3</sup>, Sanjib Sinha<sup>3</sup>, Madhu Nagappa<sup>3</sup>, Rose Dawn Bharath<sup>4</sup>, Anita Mahadevan<sup>5</sup>, Gayathri Narayanappa<sup>5</sup>, Yasha T. Chickabasaviah<sup>5</sup>, Arun Kumar<sup>1\*</sup>

<sup>1</sup>Department of Molecular Reproduction, Development and Genetics, Indian Institute of Science, Bangalore 560012, India.

<sup>2</sup>Department of Biotechnology, R.V. College of Engineering, Bangalore 560059, India.

<sup>3</sup>Department of Neurology, National Institute of Mental Health and Neuro Sciences, Bangalore 560029, India.

<sup>4</sup>Department of Neuroimaging and Interventional Radiology, National Institute of Mental Health and Neuro Sciences, Bangalore 560029, India.

<sup>5</sup>Department of Neuropathology, National Institute of Mental Health and Neuro Sciences, Bangalore 560029, India.

\* Corresponding authors

E-mails: karun@mrdg.iisc.ernet.in (AK) and drpsbindu@yahoo.co.in (PSB)

¶ These authors contributed equally to this work.

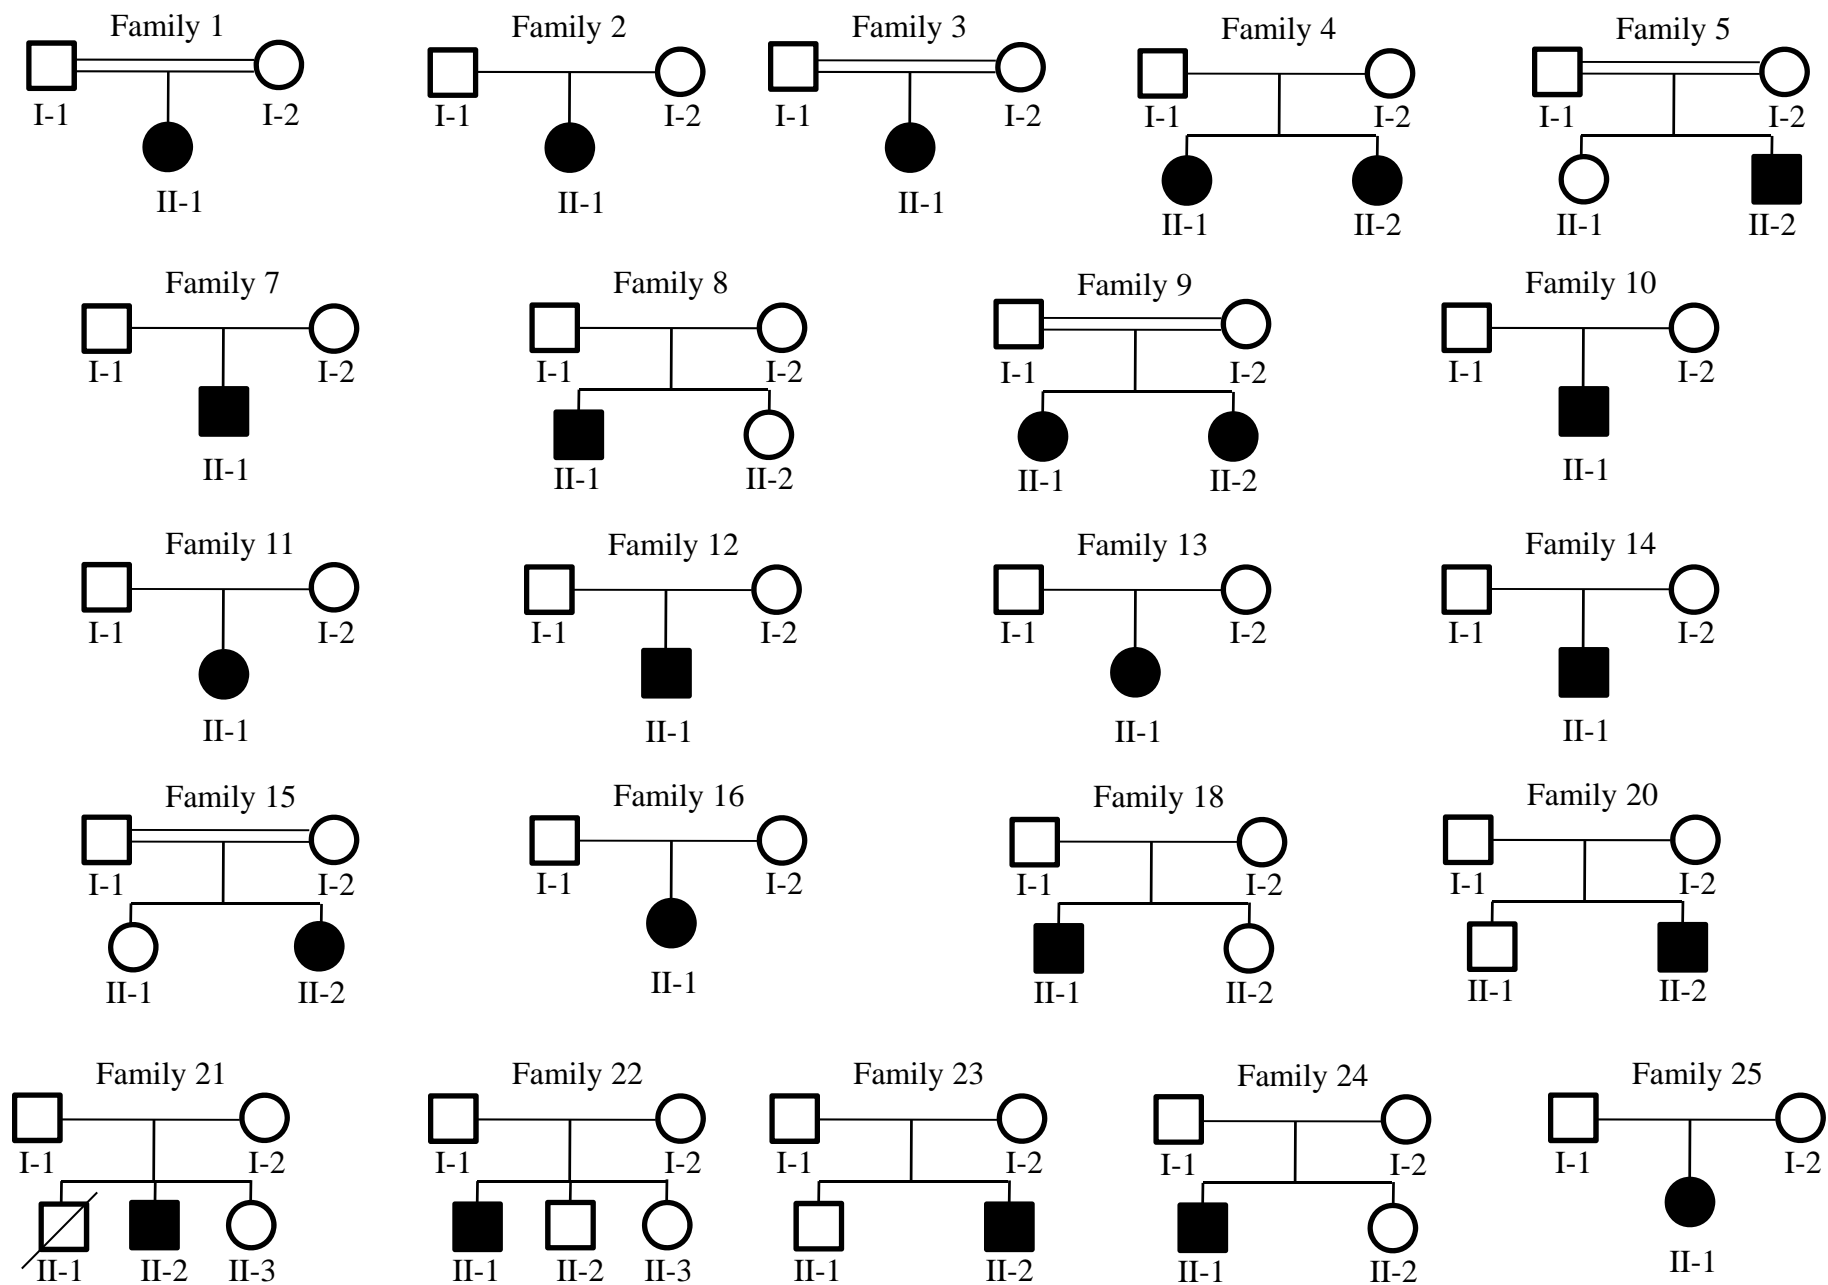

Fig A. Pedigrees of PLAN families.

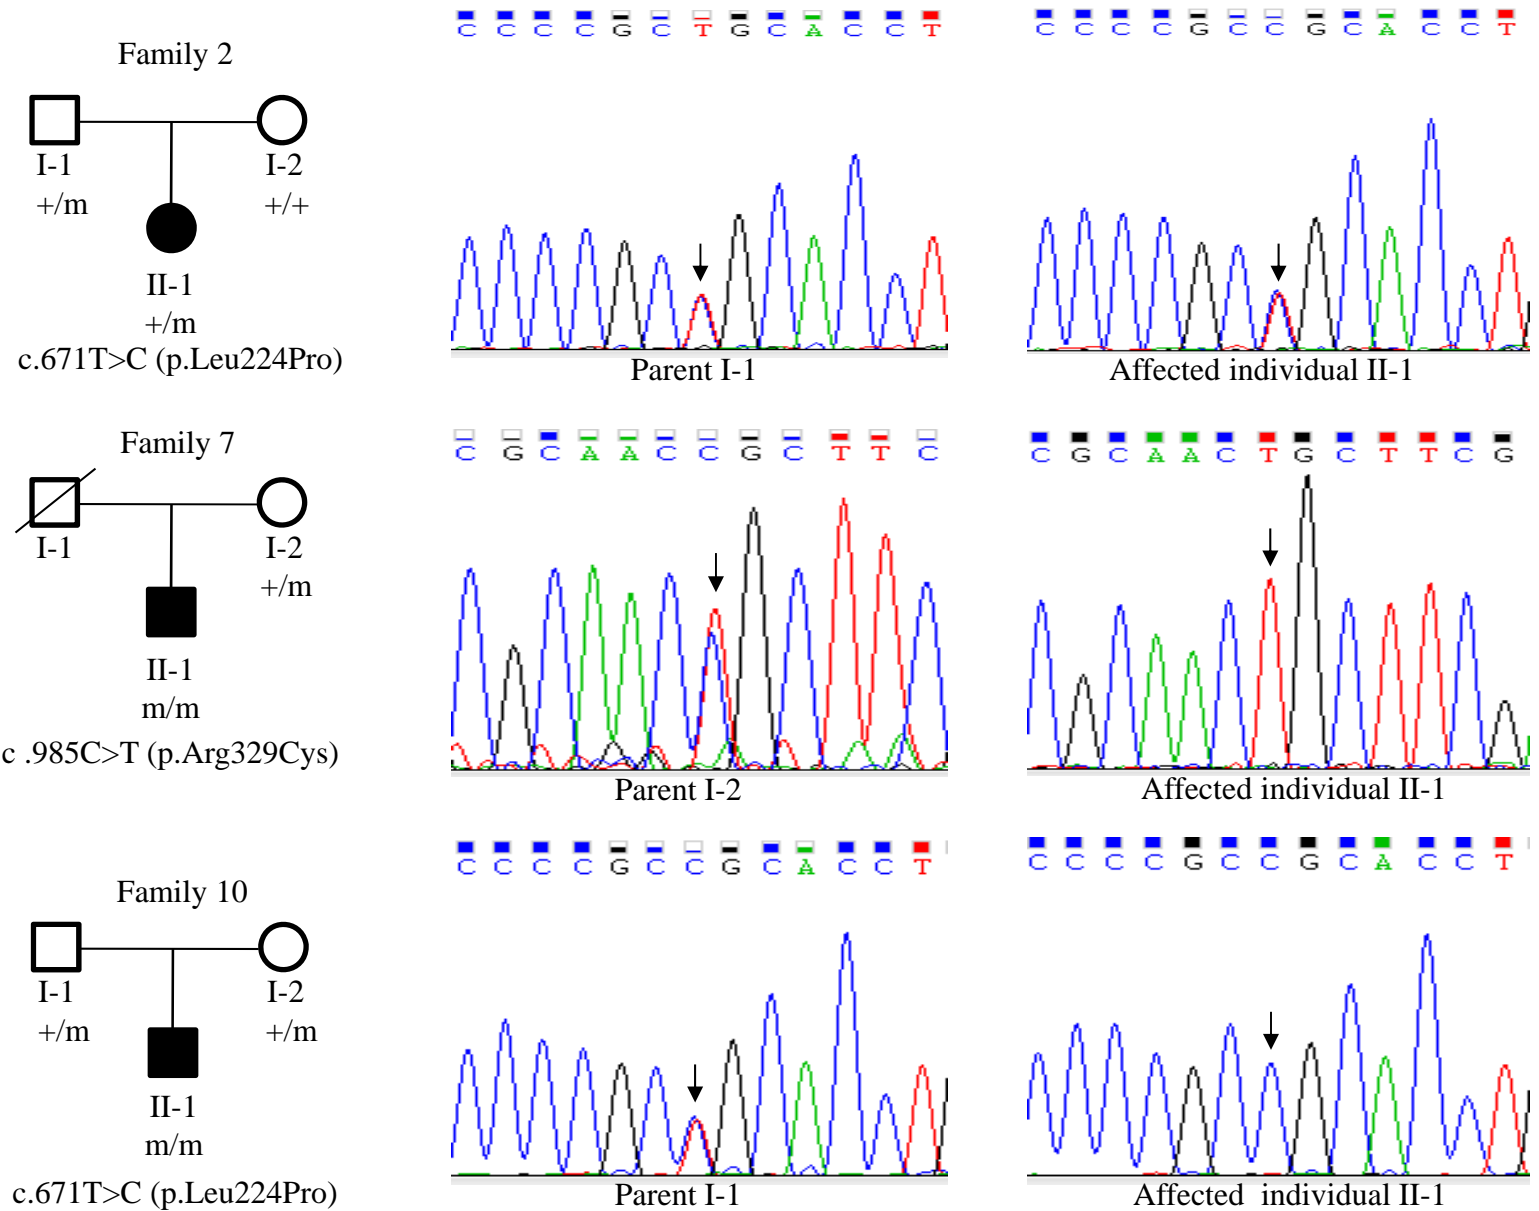

**Fig B. DNA sequence analysis of individuals.** (Upper panel) Sequencing chromatograms from the parent I-1 and the affected individual II-1 from family 2. Arrows mark the T>C change in a heterozygous state in the parent I-1 and the affected individual II-1. (Middle panel) Sequencing chromatograms from the parent I-2 and the affected individual II-1 from family 7. Arrows mark the C>T change in a heterozygous state in the parent I-2 and in a homozygous state in the affected individual II-1. (Lower panel) Sequencing chromatograms from the parent I-1 and the affected individual II-1 from family 10. Arrows mark the T>C change in a heterozygous state in the parent I-1 and in a homozygous state in the affected individual II-1. + and m denote the wild type and mutant alleles, respectively.

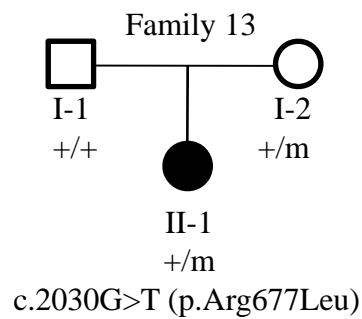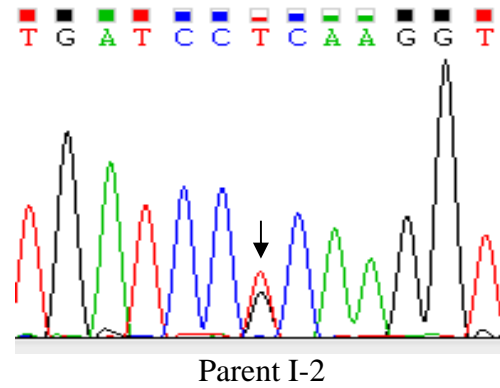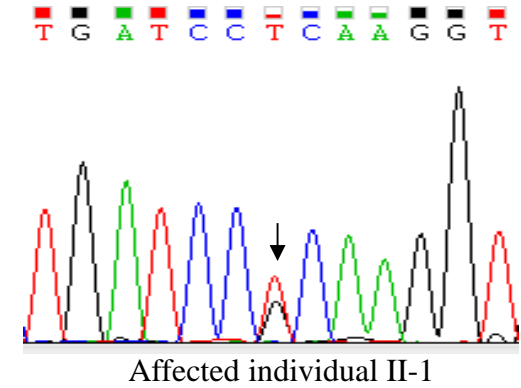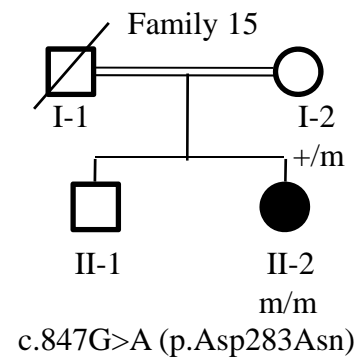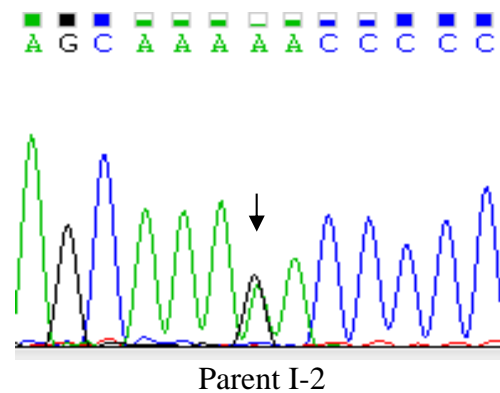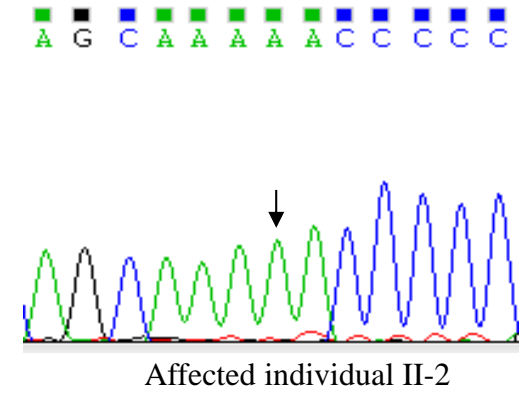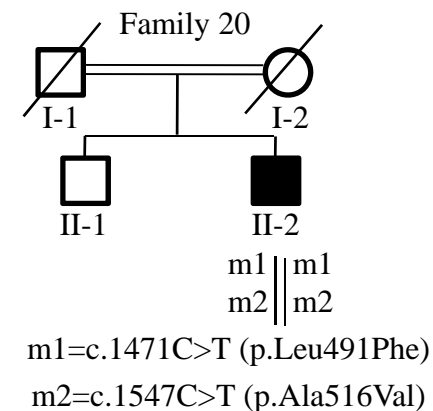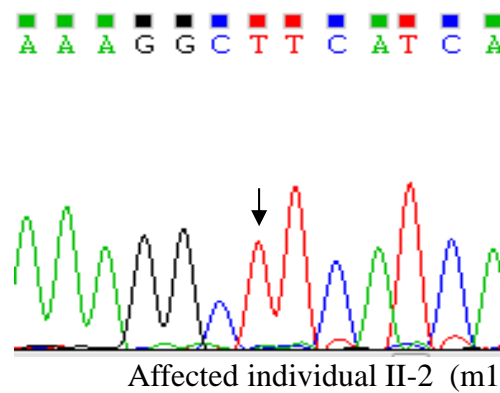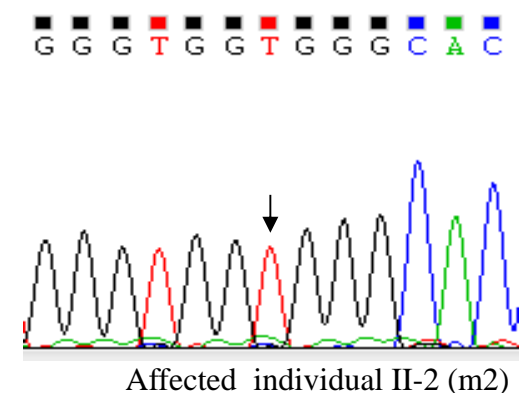

**Fig C. DNA sequence analysis of individuals.** (Upper panel) Sequencing chromatograms from the parent I-2 and the affected individual II-1 from family 13. Arrows mark the G>T change in a heterozygous state in the parent I-2 and the affected individual II-1. (Middle panel) Sequencing chromatograms from the parent I-2 and the affected individual II-2 from family 15. Arrows mark the G>A change in a heterozygous state in the parent I-2 and in a homozygous state in the affected individual II-2. (Lower panel) Sequencing chromatograms from the affected individual II-2 from family 20. Arrows mark the C>T change in a homozygous state in the affected individual II-2. Note, this individual is homozygous for two different mutations. + and m denote the wild type and mutant alleles, respectively. m1 and m2 denote different mutant alleles.

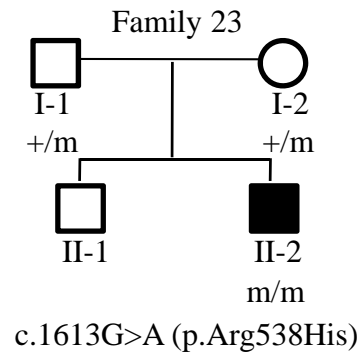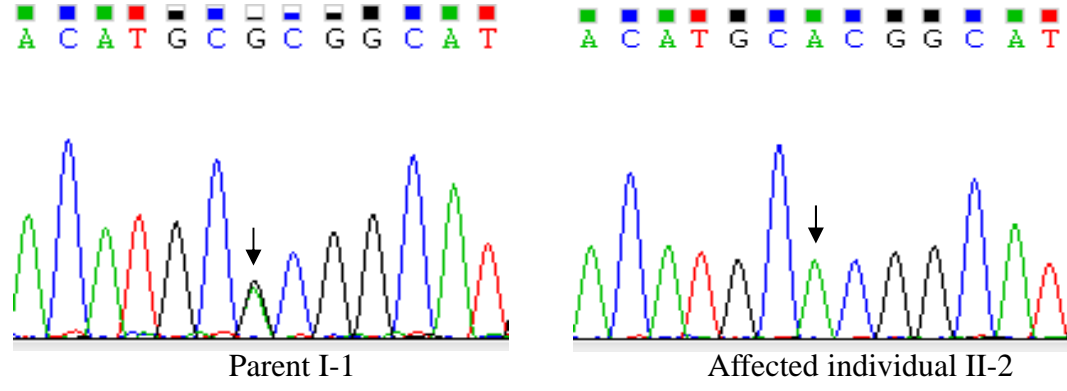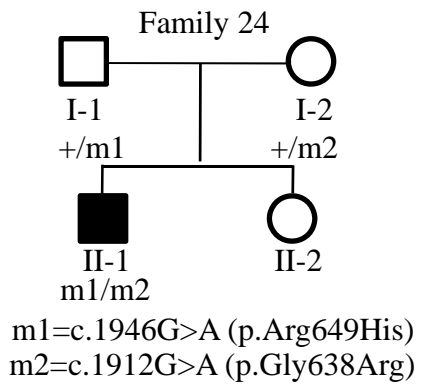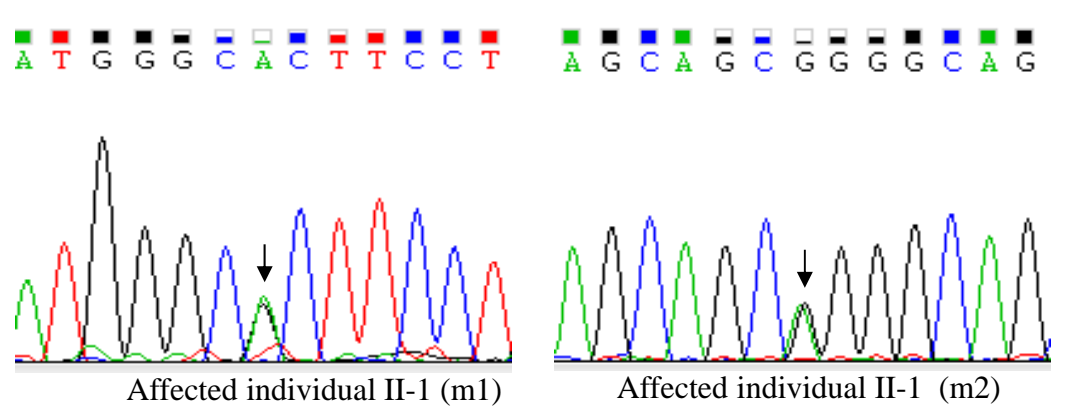

**Fig D. DNA sequence analysis of individuals.** (Upper panel) Sequencing chromatograms from the the parent I-1 and the affected individual II-2 from family 23. Arrows mark the G>A change in a heterozygous state in the parent I-1 and in a homozygous state the affected individual II-2. + and m denote the wild type and the mutant alleles, respectively. (Lower panel) Sequencing chromatograms from the affected individual II-1 from family 24. Arrows mark the G>A change in a heterozygous state in the affected individual II-1. m1 and m2 denote different mutation alleles.

**Table A.** Details of PCR primers used in the mutation analysis of the *PLA2G6* gene.

| Sl. # | Exon | Primer Sequence (5' to 3')      | T <sub>m</sub> (°C) | Amplicon size (bp) |
|-------|------|---------------------------------|---------------------|--------------------|
| 1     | 2    | F:AGTGATCTGGGTGTCTGTGCAGGA      | 64                  | 465                |
|       |      | R:CTCTCCAGACCCCTCAGACAGAGA      |                     |                    |
| 2     | 3    | F:ACCTTCTGATTCCAGCAGGGATGTG     | 64                  | 445                |
|       |      | R:AGTGCTGGGACTGCGTTAGTGAGC      |                     |                    |
| 3     | 4    | F:CCATCTCTTGTACGAGTGAGCAAAC     | 64                  | 647                |
|       |      | R:GTTGGAGGCCGTCCCCAGGTTTA       |                     |                    |
| 4     | 5    | F:GCCCCGGCCTCTTTACGTTCTTATC     | 64                  | 394                |
|       |      | R:GAGGCTTGTGAACCCGGGGCCT        |                     |                    |
| 5     | 6    | F:AGCAGTAGATGAAGCTCCAAGTCCTG    | 64                  | 485                |
|       |      | R:ACTTTACAATTTGTGCCGAGTTTTGTCAC |                     |                    |
| 6     | 7    | F:TGCTAGCGCTTTCCAACATCCCA       | 64                  | 418                |
|       |      | R:AGCAGCTGACGATAGGAGGGAGA       |                     |                    |
| 7     | 8    | F:TCCCCTGTGGGTGCTTTTAAGCCTG     | 64                  | 441                |
|       |      | R:GTCAGCACAGGATGCTGGCACCTG      |                     |                    |
| 8     | 9    | F:GCTGGGACAGGGGACGGAGTGTG       | 64                  | 361                |
|       |      | R:ACTTCCGTCCTAGGGATCCTGTTGC     |                     |                    |
| 9     | 10   | F:TGGCCGTGGGCGAGGCACAGC         | 72                  | 369                |
|       |      | R:GCATTAATGAACGAGCGACACAGGC     |                     |                    |
| 10    | 11   | F:GGACAGAAGTTCCTCGGGTCCGTC      | 69                  | 584                |
|       |      | R:TTAAGGCAGTCGATAGGAAACGCTTC    |                     |                    |
| 11    | 12   | F:CTGCGTTCAGGCGCTCTGCAGGC       | 64                  | 352                |
|       |      | R:CCTCAAGCGTGGGGCGCTCTTCC       |                     |                    |
| 12    | 13   | F:GGAGAAGCCACCTATCCCGAACA       | 66                  | 359                |
|       |      | R:TGATGGCAAGTGCACGACTCCAC       |                     |                    |
| 13    | 14   | F:CCACCAGGACGAAGTAGCCAGAGA      | 66                  | 422                |
|       |      | R:CTGTCCTGGGGGTCGGTCCCTAG       |                     |                    |
| 14    | 15   | F:TGATGCCCCGACCCAGCCGTTCTG      | 66                  | 500                |
|       |      | R:CAGCTGGCTAAAGGCGATGGACA       |                     |                    |
| 15    | 16   | F:CTCAGCCTGACTCGAAAGAGCCTG      | 66                  | 272                |
|       |      | R:TGGGAGGGGAAGGTCGGTGAGTC       |                     |                    |
| 16    | 17   | F:TGCCCTGGCGTGGTCCGACTCAC       | 66                  | 616                |
|       |      | R:GTGCCCGGGTACCCTTAATGTTTGA     |                     |                    |

Abbreviations: F, forward primer; R, reverse primer; bp, base pairs; and T<sub>m</sub>, Annealing temperature.

**Table B.** Details of primers used in allele-specific PCR.

| S.No. | Mutation                   | Primer Sequence (5' to 3')      | T <sub>m</sub><br>(°C) | Amplicon<br>size (bp) |
|-------|----------------------------|---------------------------------|------------------------|-----------------------|
| 1     | c.671T>C<br>(p.Leu224Pro)  | F:ATAACCAAGGGCTGACCCCGCC        | 64                     | 246                   |
|       |                            | R:GAGGCTTGTGAACCCGGGGCCT        |                        |                       |
| 2     | c.847G>A<br>(p.Asp283Gln)  | F:GGACAGCAGCCAGATCCACAGCAAAA    | 70                     | 317                   |
|       |                            | R:ACTTTACAATTTGTGCCGAGTTTTGTCAC |                        |                       |
| 3     | c.985C>T<br>(p.Arg329Cys)  | F:CACGTGGCGGTGATGCGCAACT        | 64                     | 178                   |
|       |                            | R:AGCAGCTGACGATAGGAGGGAGA       |                        |                       |
| 4     | c.1471C>T<br>(p.Leu491Phe) | F:TGGAGGAGGAGTGAAAGGCT          | 60                     | 216                   |
|       |                            | R:CTTATAGCCCTCCTCTACTCC         |                        |                       |
| 5     | c.1613G>A<br>(p.Arg538His) | F:TAAGTCCATGGCCTACATGCA         | 66                     | 116                   |
|       |                            | R:GGGCTTACTTGGGTTTCCTGA         |                        |                       |
| 6     | c.1946G>A<br>(p.Arg649His) | F:TACTTCCGACCCAATGGGCA          | 66                     | 157                   |
|       |                            | R:CTGGGGGTCGGTCCCTAG            |                        |                       |

Abbreviations: F, forward primer; R, reverse primer; T<sub>m</sub>, annealing temperature; and, bp, base pairs.

**Table C.** Known mutations in *PLA2G6*.

| Sl. # | Mutation                        | Exon/intron (IVS) | Nature of mutation | State of zygosity                                                                                                                                                 | Effect on protein                                              | Disease    | Number and ethnic origin of family                        | Reference               |
|-------|---------------------------------|-------------------|--------------------|-------------------------------------------------------------------------------------------------------------------------------------------------------------------|----------------------------------------------------------------|------------|-----------------------------------------------------------|-------------------------|
| 1     | c.1A>G<br>(p.Met1Val)           | 2                 | Missense           | Heterozygous or compound heterozygous with c.109C>T (p.Arg37*) or c.1111G>A (p.Val371Met)                                                                         | Defect in function of protein if leads to abnormal translation | INAD       | 6 Chinese                                                 | 11, 24                  |
| 2     | c.4C>A<br>(p.Gln2Lys)           | 2                 | Missense           | Compound heterozygous with deletion of exon 3                                                                                                                     | Inactivates protein                                            | ANAD       | 1 French                                                  | 16                      |
| 3     | c.27_28insA<br>(p.Thr10Asnfs*9) | 2                 | Insertion          | Compound heterozygous with c.668C>A (p.Pro223Gln)                                                                                                                 | Premature protein truncation                                   | INAD       | 1 Chinese                                                 | 24                      |
| 4     | c.109C>T<br>(p.Arg37*)          | 2                 | Nonsense           | Homozygous or compound heterozygous with c.1A>G (p.Met1Val), c.609_894del286 (p.Leu204_Glu298del95), c.692G>T (p.Gly231Val), IVS8 - 3C>Aorc.1501G>C (p.Glu501Gln) | Premature protein truncation                                   | INAD & DPC | 4 British, 3 American, 3 Chinese, 1 Pakistani & 1 Italian | 1, 3, 9, 11, 14, 21, 24 |
| 5     | c.116G>T<br>(p.Arg39Gln)        | 2                 | Missense           | Compound heterozygous with c.1771C>T (p.Arg591Trp)                                                                                                                | Inactivates protein                                            | INAD       | 2 Chinese                                                 | 11, 24                  |
| 6     | c.171C>A<br>(p.Cys57*)          | 2                 | Nonsense           | Homozygous                                                                                                                                                        | Premature protein                                              | INAD       | 1 Chinese                                                 | 24                      |



|    |                                       |   |             |                                                                                                  |                                                                       |             |                                              |                             |
|----|---------------------------------------|---|-------------|--------------------------------------------------------------------------------------------------|-----------------------------------------------------------------------|-------------|----------------------------------------------|-----------------------------|
|    |                                       |   |             |                                                                                                  | truncation                                                            |             |                                              |                             |
| 7  | c.208C>T<br>(p.Arg70*)                | 2 | Nonsense    | Homozygous or heterozygous                                                                       | Truncated protein or mRNA degradation by nonsense-mediated mRNA decay | INAD        | 1 Chinese & 1 Indian                         | 11, Present study           |
| 8  | Exon 3 deletion                       | 3 | Deletion    | Compound heterozygous with c.4C>A (p.Gln2Lys)                                                    | Inactivates protein                                                   | ANAD        | 1 French                                     | 16                          |
| 9  | c.216C>A<br>(p.Phe72Leu)              | 3 | Missense    | Compound heterozygous with c.1904G>A (p.Arg635Gln)                                               | Inactivates protein                                                   | DPC         | 1 Japanese                                   | 15                          |
| 10 | c.238G>A<br>(p.Ala80Thr)              | 3 | Missense    | Homozygous or compound heterozygous with c.2370_2371delTG (p.Tyr790*) or c.1970C>T (p.Ala657Val) | Inactivates protein                                                   | INAD & ANAD | 1 British, 2 Chinese, 1 American & 1 Indian  | 1, 3, 11, 24, Present study |
| 11 | c.317delT<br>(p.Val106fs*110)         | 3 | Deletion    | Homozygous                                                                                       | Premature protein truncation                                          | INAD        | 1 American                                   | 1                           |
| 12 | c.319delC<br>(p.Leu107fs*110)         | 3 | Deletion    | Heterozygous                                                                                     | Premature protein truncation                                          | ANAD & DPC  | 1 British, 1 American & 1 American Caucasian | 1, 3, 21                    |
| 13 | c.369_377dup<br>(p.His124_Ala126 dup) | 3 | Duplication | Compound heterozygous with c.1903C>T (p.Arg635*)                                                 | Inactivates protein                                                   | INAD        | 1 Tunisian                                   | 30                          |
| 14 | c.372delC<br>(p.His124Leufs*324)      | 3 | Deletion    | Compound heterozygous with c.2261G>T (p.Gly754Val)                                               | Premature protein truncation                                          | ANAD        | 1 Chinese                                    | 24                          |

|    |                                           |     |             |                                                                             |                                        |             |                                                      |        |
|----|-------------------------------------------|-----|-------------|-----------------------------------------------------------------------------|----------------------------------------|-------------|------------------------------------------------------|--------|
| 15 | c.404T>C<br>(p.Phe135Ser)                 | 3   | Missense    | Compound heterozygous with c.1472T>G (p.Leu491Arg)                          | Inactivates protein                    | INAD        | 1 British & 1 American                               | 1, 3   |
| 16 | c.439G>A<br>(p.Ala147Thr)                 | 4   | Missense    | Compound heterozygous with c.2132C>T (p.Pro711Leu)                          | Inactivates protein                    | INAD        | 1 British & 1 American                               | 1, 3   |
| 17 | c.469C>T<br>(p.His157Tyr)                 | 4   | Missense    | Homozygous                                                                  | May interfere with the oligomerization | INAD        | 1 British & 1 American                               | 1, 3   |
| 18 | c.470A>G<br>(p.His157Arg)                 | 4   | Missense    | Compound heterozygous with c.1021G>A (p.Ala341Thr) or c.1903C>T (p.Arg635*) | May interfere with the oligomerization | INAD        | 2 British & 2 American                               | 1, 3   |
| 19 | Duplication of exons 4-7                  | 4-7 | Duplication | Compound heterozygous with c.1674delG (p.Leu560Trpfs*5)                     | May interfere with the oligomerization | INAD        | 2 Caucasian                                          | 12, 28 |
| 20 | IVS5 -1G>T                                | 5   | Splice site | Compound heterozygous with c.2370delTG (p.Tyr790*)                          | Premature protein truncation           | INAD & DPC  | 1 American                                           | 21     |
| 21 | c.609_894del286<br>(p.Leu204_Glu298del95) | 5-6 | Deletion    | Compound heterozygous with c.109C>T (p.Arg37*)                              | May interfere with the oligomerization | INAD        | 1 Italian                                            | 14     |
| 22 | c.665C>T<br>(p.Thr222Ile)                 | 5   | Missense    | Heterozygous                                                                | May interfere with the oligomerization | INAD        | 1 Caucasian of western European descent & 1 American | 1, 8   |
| 23 | c.668C>A<br>(p.Pro223Gln)                 | 5   | Missense    | Homozygous or compound heterozygous with c.27_28insA                        | May interfere with the oligomerization | INAD & ANAD | 2 Chinese & 1 American                               | 1, 24  |

|    |                                             |     |          |                                                             |                                              |      |                           |               |
|----|---------------------------------------------|-----|----------|-------------------------------------------------------------|----------------------------------------------|------|---------------------------|---------------|
|    |                                             |     |          | (p.Thr10Asnfs*9)                                            |                                              |      |                           |               |
| 24 | c.671T>C<br>(p.Leu224Pro)                   | 5   | Missense | Homozygous or<br>Heterozygous                               | May interfere<br>with the<br>oligomerization | INAD | 2 Indian                  | Present study |
| 25 | c.673C>T<br>(p.His225Tyr)                   | 5   | Missense | Homozygous                                                  | May interfere<br>with the<br>oligomerization | ANAD | 1 Saudi<br>Arabian        | 25            |
| 26 | c.691G>C<br>(p.Gly231Arg)                   | 5   | Missense | Compound<br>heterozygous with<br>c.2370T>G<br>(p.Tyr790*)   | May interfere<br>with the<br>oligomerization | ANAD | 1 Caucasian               | 28            |
| 27 | c.692G>T<br>(p.Gly231Val)                   | 5   | Missense | Compound<br>heterozygous with<br>c.109C>T<br>(p.Arg37*)     | May interfere<br>with the<br>oligomerization | INAD | 1 Chinese                 | 24            |
| 28 | c.719T>C<br>(p.Leu240Pro)                   | 5   | Missense | Compound<br>heterozygous with<br>c.1978C>A<br>(p.Pro660Thr) | May interfere<br>with the<br>oligomerization | INAD | 1 Arabic                  | 9             |
| 29 | c.751_759del9bp<br>(p.Pro251_Gly25<br>3del) | 5   | Deletion | Compound<br>heterozygous with<br>c.1463T>G<br>(p.Val488Gly) | May interfere<br>with the<br>oligomerization | INAD | 1 British & 1<br>American | 1, 3          |
| 30 | c.755delA<br>(p.Asn252fs*260)               | 5   | Deletion | Compound<br>heterozygous with<br>c.1061T>C<br>(p.Leu354Pro) | Premature<br>protein<br>truncation           | INAD | 1 British & 1<br>American | 1, 3          |
| 31 | Exon5 or 6<br>deletion                      | 5-6 | Deletion | Homozygous                                                  | May interfere<br>with the<br>oligomerization | INAD | 2 Irish                   | 12            |
| 32 | c.847G>A<br>(p.Asp283Asn)                   | 6   | Missense | Homozygous                                                  | May interfere<br>with<br>oligomerization     | INAD | 1 Indian                  | Present study |
| 33 | c.848A>G<br>(p.Asp283Gly)                   | 6   | Missense | Homozygous                                                  | May interfere<br>with the<br>oligomerization | INAD | 1 British & 1<br>American | 1, 3          |
| 34 | c.858C>G<br>(p.Thr286*)                     | 6   | Nonsense | Heterozygous                                                | Premature<br>protein                         | INAD | 1 Chinese                 | 24            |

|    |                         |      |             |                                                                     |                                        |      |                                   |                     |
|----|-------------------------|------|-------------|---------------------------------------------------------------------|----------------------------------------|------|-----------------------------------|---------------------|
|    |                         |      |             |                                                                     | truncation                             |      |                                   |                     |
| 35 | IVS7 -1G>A              | IVS7 | Splice site | Compound heterozygous with IVS8 +1G>A                               | Premature protein truncation           | INAD | 1 Italian                         | 14                  |
| 36 | c.901C>T (p.Arg301Cys)  | 7    | Missense    | Heterozygous                                                        | May interfere with the oligomerization | DPC  | 1 Japanese                        | 19                  |
| 37 | c.905T>G (p.Met302Arg)  | 7    | Missense    | Homozygous                                                          | May interfere with the oligomerization | INAD | 1 Pakistani                       | 9                   |
| 38 | c.929T>A (p.Val310Glu)  | 7    | Missense    | Homozygous or compound heterozygous with IVS10 + 1G>A               | May interfere with the oligomerization | INAD | 1 British, 1 American & 1 Chinese | 1, 3, 11            |
| 39 | c.985C>T (p.Arg329Cys)  | 7    | Missense    | Homozygous                                                          | May interfere with oligomerization     | INAD | 1 Indian                          | Present study       |
| 40 | c.991G>T (p.Asp331Tyr)  | 7    | Missense    | Homozygous or compound heterozygous with c.1077G>A (p.Met358Ilefs*) | Reduction in enzyme activity           | DPC  | 3 Taiwanese & 1 Japanese          | 18, 20              |
| 41 | c.991G>A (p.Asp331Asn)  | 7    | Missense    | Heterozygous                                                        | May interfere with the oligomerization | DPC  | 1 Japanese                        | 19                  |
| 42 | c.1018G>A (p.Gly340Arg) | 7    | Missense    | Homozygous                                                          | May interfere with the oligomerization | INAD | 1 British & 1 American            | 1, 3                |
| 43 | c.1021G>A (p.Ala341Thr) | 7    | Missense    | Compound heterozygous with c.470A>G (p.His157Arg)                   | May interfere with the oligomerization | INAD | 1 British & 1 American            | 1, 3                |
| 44 | c.1039G>A (p.Gly347Arg) | 7    | Missense    | Homozygous                                                          | May interfere with the oligomerization | INAD | 2 American, 1 British & 1 Indian  | 1, 3, Present study |
| 45 | c.1058C>T (p.Pro353Leu) | 7    | Missense    | Compound heterozygous with c.1549G>T                                | May interfere with the oligomerization | INAD | 1 British & 1 American            | 1, 3                |

|    |                                  |      |             |                                                                                                         |                                            |                  |                         |          |
|----|----------------------------------|------|-------------|---------------------------------------------------------------------------------------------------------|--------------------------------------------|------------------|-------------------------|----------|
|    |                                  |      |             | (p.Gly517Cys)                                                                                           |                                            |                  |                         |          |
| 46 | c.1061T>C<br>(p.Leu354Pro)       | 7    | Missense    | Compound heterozygous with c.755delA (p.Asn252fs*260), c.1933C>T (p.Arg654*) or c.2215G>C (p.Asp739His) | May interfere with the oligomerization     | INAD, ANAD & DPC | 2 British & 3 American  | 1, 3, 21 |
| 47 | c.1077G>A<br>(p.Met358Ilefs*6)   | 7    | Frameshift  | Heterozygous or compound heterozygous with c.991G>T (p.Asp331Tyr) or IVS10 + 1G>A                       | Premature protein truncation               | INAD & DPC       | 3 Chinese & 2 Taiwanese | 20, 24   |
| 48 | c.1103C>A<br>(p.Ala368Asp)       | 7    | Missense    | Compound heterozygous with c.1417G>T (p.Glu473*)                                                        | May interfere with the oligomerization     | INAD             | 1 British               | 9        |
| 49 | IVS8 -3C>A                       | IVS8 | Splice site | Compound heterozygous with c.109C>T (p.Arg37*)                                                          | Premature protein truncation               | INAD & DPC       | 1 British               | 21       |
| 50 | c.1111G>A<br>(p.Val371Met)       | 8    | Missense    | Compound heterozygous with c.1A>G (p.Met1Val)                                                           | May interfere with the oligomerization     | INAD             | 2 Chinese               | 11, 24   |
| 51 | c.1117G>A<br>(p.Gly373Arg)       | 8    | Missense    | Compound heterozygous with c.1633A>G (p.Lys545Glu) or c.2065A>T (p.Ile689Phe)                           | May interfere with oligomerization         | INAD             | 3 Chinese               | 11, 24   |
| 52 | c.1125delA<br>(p.Glu376Trpfs*14) | 8    | Deletion    | Homozygous                                                                                              | Predicted to lead to the nonsense mediated | INAD             | 1 Saudi Arabian         | 25       |

|    |                               |       |             |                                                                                                              |                                                        |      |                                                        |                |
|----|-------------------------------|-------|-------------|--------------------------------------------------------------------------------------------------------------|--------------------------------------------------------|------|--------------------------------------------------------|----------------|
|    |                               |       |             |                                                                                                              | mRNA decay                                             |      |                                                        |                |
| 53 | IVS8 +1G>A                    | IVS8  | Splice site | Compound heterozygous with IVS7 -1G>A                                                                        | Defect in function of protein due to aberrant splicing | INAD | 1 Italian                                              | 14             |
| 54 | IVS9 -2A>G                    | IVS9  | Splice site | Compound heterozygous with c.1612C>T (p.Arg538Cys)                                                           | Defect in function of protein due to aberrant splicing | ANAD | 1 Japanese                                             | 26             |
| 55 | c.1351delC (p.Leu451fs*470)   | 10    | Deletion    | Homozygous                                                                                                   | Premature protein truncation                           | INAD | 2 British & 1 American                                 | 1, 3           |
| 56 | c.1351delC (p.Leu451Tyrfs*20) | 10    | Deletion    | Homozygous                                                                                                   | Premature protein truncation                           | INAD | 1 Portuguese                                           | 27             |
| 57 | c.1354C>T (p.Gln452*)         | 10    | Nonsense    | Compound heterozygous with c.1904G>A (p.Arg635Gln)                                                           | Premature protein truncation                           | DPC  | 1 Japanese                                             | 15             |
| 58 | c.1417G>T (p.Glu473*)         | 10    | Nonsense    | Compound heterozygous with c.1103C>A (p.Ala368Asp)                                                           | Premature protein truncation                           | INAD | 1 British                                              | 9              |
| 59 | IVS10 +1G>A                   | IVS10 | Splice site | Homozygous, heterozygous or compound heterozygous with c.929T>A (p.Val310Glu) or c.1077G>A (p.Met358Ilefs*6) | Defect in function of protein due to aberrant splicing | INAD | 5 Chinese                                              | 11, 24         |
| 60 | c.1442T>A (p.Leu481Gln)       | 11    | Missense    | Homozygous or compound heterozygous with c.2070_2072delTGT (p.Val691del) or                                  | Inactivates protein                                    | INAD | 2 British, 2 American, 1 Caucasian of western European | 1, 3, 8, 29,30 |

|    |                                            |    |             |                                                                                            |                                    |      |                                        |               |
|----|--------------------------------------------|----|-------------|--------------------------------------------------------------------------------------------|------------------------------------|------|----------------------------------------|---------------|
|    |                                            |    |             | c.2370T>G<br>(p.Tyr790*)                                                                   |                                    |      | descent, 1<br>Tunisian & 1<br>Moroccan |               |
| 61 | c.1463T>G<br>(p.Val488Gly)                 | 11 | Missense    | Compound<br>heterozygous with<br>c.751_759del9bp<br>(p.Pro251_Gly253del)                   | Inactivates<br>protein             | INAD | 1 British & 1<br>American              | 1, 3          |
| 62 | c.1471C>T<br>(p.Leu491Phe)                 | 11 | Missense    | Homozygous with<br>c.1547C>T<br>(p.Ala516Val)                                              | Inactivates<br>protein             | INAD | 1 Indian                               | Present study |
| 63 | c.1472T>G<br>(p.Leu491Arg)                 | 11 | Missense    | Compound<br>heterozygous with<br>c.404T>C<br>(p.Phe135Ser)                                 | Inactivates<br>protein             | INAD | 1 British & 1<br>American              | 1, 3          |
| 64 | c.1496C>T<br>(p.Ala499Val)                 | 11 | Missense    | Compound<br>heterozygous with<br>c.1903C>T<br>(p.Arg635*)                                  | Inactivates<br>protein             | INAD | 1 Chinese                              | 24            |
| 65 | c.1501G>C<br>(p.Glu501Gln)                 | 11 | Missense    | Compound<br>heterozygous with<br>c.109C>T<br>(p.Arg37*)                                    | Inactivates<br>protein             | INAD | 1 British & 1<br>American              | 1, 3          |
| 66 | c.1506G>C<br>(p.Lys502Asn)                 | 11 | Missense    | Compound<br>heterozygous with<br>c.1612C>T<br>(p.Arg538Cys) or<br>c.1903C>T<br>(p.Arg635*) | Inactivates<br>protein             | INAD | 2 American<br>& 1 British              | 1, 3          |
| 67 | c.1524dupC<br>(p.Leu509Glnfs*5<br>)        | 11 | Duplication | Compound<br>heterozygous with<br>c.1798C>T<br>(p.Arg600Trp)                                | Premature<br>protein<br>truncation | INAD | 1 Caucasian                            | 30            |
| 68 | c.1538_1541delA<br>CTG<br>(p.Asp513fs*543) | 11 | Deletion    | Compound<br>heterozygous with<br>c.2370_2371delTG<br>(p.Tyr790*)                           | Premature<br>protein<br>truncation | INAD | 1 British & 1<br>American              | 1, 3          |
| 69 | c.1547C>T                                  | 11 | Missense    | Homozygous with                                                                            | Inactivates                        | INAD | 1 Indian                               | Present study |

|    |                                     |    |          |                                                                                |                                    |                |                                          |               |
|----|-------------------------------------|----|----------|--------------------------------------------------------------------------------|------------------------------------|----------------|------------------------------------------|---------------|
|    | (p.Ala516Val)                       |    |          | c.1471C>T<br>(p.Leu491Phe)                                                     | protein                            |                |                                          |               |
| 70 | c.1549G>T<br>(p.Gly517Cys)          | 11 | Missense | Compound<br>heterozygous with<br>c.1058C>T<br>(p.Pro353Leu)                    | Inactivates<br>protein             | INAD           | 1 British & 1<br>American                | 1, 3          |
| 71 | c.1610T>A<br>(p.Met537Lys)          | 12 | Missense | Homozygous                                                                     | Inactivates<br>protein             | INAD           | 1 Chinese                                | 24            |
| 72 | c.1612C>T<br>(p.Arg538Cys)          | 12 | Missense | Compound<br>heterozygous with<br>IVS9 -2A>G or<br>c.1506G>C<br>(p.Lys502Asn)   | Inactivates<br>protein             | ANAD &<br>INAD | 1 British, 1<br>American &<br>1 Japanese | 1, 3, 26      |
| 73 | c.1613G>A<br>(p.Arg538His)          | 12 | Missense | Homozygous                                                                     | Inactivates<br>protein             | INAD           | 1 Indian                                 | Present study |
| 74 | c.1633A>G<br>(p.Lys545Glu)          | 12 | Missense | Heterozygous or<br>compound<br>heterozygous with<br>c.1117G>A<br>(p.Gly373Arg) | Inactivates<br>protein             | INAD           | 3 Chinese                                | 11, 24        |
| 75 | c.1634A>C<br>(p.Lys545Thr)          | 12 | Missense | Homozygous                                                                     | Inactivates<br>protein             | ANAD           | 5 Pakistani                              | 3, 9          |
| 76 | c.1776A>G<br>(p.Glu547Gly)          | 12 | Missense | Homozygous                                                                     | Inactivates<br>protein             | ANAD           | 1 Tunisian                               | 30            |
| 77 | c.1674delG<br>(p.Leu560Trpfs*5<br>) | 12 | Deletion | Compound<br>heterozygous with<br>duplication of exons 4-<br>7                  | Premature<br>protein<br>truncation | INAD           | 2 Caucasian                              | 12, 28        |
| 78 | c.1699G>A<br>(p.Glu567Lys)          | 12 | Missense | Compound<br>heterozygous with<br>c.1754C>T<br>(p.Thr585Ile)                    | Inactivates<br>protein             | INAD           | 1 British & 1<br>American                | 1, 3          |
| 79 | c.1703T>G<br>(p.Phe568Val)          | 12 | Missense | Homozygous                                                                     | Inactivates<br>protein             | INAD           | 1 Tunisian                               | 30            |
| 80 | c.1715 C>T<br>(p.Thr572Ile)         | 12 | Missense | Homozygous                                                                     | Inactivates<br>protein             | ANAD &<br>DPC  | 1 Greek                                  | 21            |
| 81 | c.1744G>T                           | 13 | Missense | Compound                                                                       | Inactivates                        | INAD &         | 1 British & 1                            | 1, 3          |



|    |                                                       |    |          |                                                                                            |                            |               |                                                  |          |
|----|-------------------------------------------------------|----|----------|--------------------------------------------------------------------------------------------|----------------------------|---------------|--------------------------------------------------|----------|
|    | (p.Val582Leu)                                         |    |          | heterozygous with<br>c.2233C>T<br>(p.Arg745Trp)                                            | protein                    | ANAD          | American                                         |          |
| 82 | c.1754C>T<br>(p.Thr585Ile)                            | 13 | Missense | Compound<br>heterozygous with<br>c.1699G>A<br>(p.Glu567Lys)                                | Inactivates<br>protein     | INAD          | 1 British & 1<br>American                        | 1, 3     |
| 83 | c.1756G>A<br>(p.Gly586Arg)                            | 13 | Missense | Homozygous                                                                                 | Inactivates<br>protein     | INAD          | 1 Caucasian                                      | 28       |
| 84 | c.1770C>T<br>(p.Asp590Glu)                            | 13 | Missense | Compound<br>heterozygous with<br>c.2221C>T<br>(p.Arg741Trp)                                | Inactivates<br>protein     | INAD          | 1 British & 1<br>American                        | 1, 3     |
| 85 | c.1771C>T<br>(p.Arg591Trp)                            | 13 | Missense | Compound<br>heterozygous with<br>c.116G>T<br>(p.Arg39Gln) or<br>c.1970C>T<br>(p.Ala657Val) | Inactivates<br>protein     | INAD          | 3 Chinese                                        | 11, 24   |
| 86 | c.1772G>A<br>(p.Arg591Gln)                            | 13 | Missense | Homozygous                                                                                 | Inactivates<br>protein     | INAD          | 1 British, 1<br>American &<br>1 Saudi<br>Arabian | 1, 3, 25 |
| 87 | c.1791delC<br>(p.His597fs*69)                         | 13 | Deletion | Heterozygous                                                                               | Reduced<br>enzyme activity | DPC           | 1 Chinese                                        | 23       |
| 88 | c.1798C>T<br>(p.Arg600Trp)                            | 13 | Missense | Compound<br>heterozygous with<br>c.1524dupC<br>(p.Leu509Glnfs*5)                           | Inactivates<br>protein     | INAD          | 1 Caucasian                                      | 28       |
| 89 | c.1799G>A<br>(p.Arg600Gln)                            | 13 | Missense | Homozygous                                                                                 | Inactivates<br>protein     | INAD &<br>DPC | 1 Hispanic                                       | 21       |
| 90 | c.PLA2G6IVS13_<br>FLJ22582IVS2del<br>(Fusion protein) | 14 | Deletion | Homozygous                                                                                 | Inactivates<br>protein     | INAD          | 2 British & 2<br>American                        | 1, 3     |
| 91 | c.1894C>T<br>(p.Arg632Trp)                            | 14 | Missense | Homozygous or<br>compound<br>heterozygous with                                             | Inactivates<br>protein     | ANAD &<br>DPC | 1 British & 1<br>Iranian                         | 3, 10    |

|    |                                  |    |          |                                                                                                                                                        |                                                             |      |                                               |                     |
|----|----------------------------------|----|----------|--------------------------------------------------------------------------------------------------------------------------------------------------------|-------------------------------------------------------------|------|-----------------------------------------------|---------------------|
|    |                                  |    |          | c.2070_2072delTGT<br>(p.Val691del)                                                                                                                     |                                                             |      |                                               |                     |
| 92 | c.1903C>T<br>(p.Arg635*)         | 14 | Nonsense | Homozygous or compound heterozygous with c.369_377dup (p.His124_Ala126dup), c.470A>G (p.His157Arg), c.1496C>T (p.Ala499Val) or c.1506G>C (p.Lys502Asn) | Premature protein truncation                                | INAD | 4 American, 2 British, 2 Chinese & 1 Tunisian | 1, 3, 24, 30        |
| 93 | c.1904G>A<br>(p.Arg635Gln)       | 14 | Missense | Compound heterozygous with c.216C>A (p.Phe72Leu) or c.1354C>T (p.Gln452*)                                                                              | Inactivates protein                                         | DPC  | 2 Japanese                                    | 15                  |
| 94 | c.1911delC<br>(p.Ser637Argfs*29) | 14 | Deletion | Homozygous                                                                                                                                             | Predicted to lead to the nonsense mediated mRNA decay       | INAD | 1 Saudi Arabian                               | 25                  |
| 95 | c.1912G>A<br>(p.Gly638Arg)       | 14 | Missense | Compound heterozygous with c.1946G>A (p.Arg649His) or c.2221C>T (p.Arg741Trp)                                                                          | Inactivates protein                                         | INAD | 1 British, 1 American & 1 Indian              | 1, 3, Present study |
| 96 | c.1946G>A<br>(p.Arg649His)       | 14 | Missense | Compound heterozygous with c.1912G>A (p.Gly638Arg)                                                                                                     | Inactivates protein                                         | DPC  | 1 Indian                                      | Present study       |
| 97 | c.1959T>A<br>(p.Gly653Gly)       | 14 | Silent   | Heterozygous                                                                                                                                           | Could interfere with signals for RNA splicing or folding or | DPC  | 1 Chinese                                     | 23                  |

|     |                                  |    |          |                                                                             |                                                       |            |                                        |               |
|-----|----------------------------------|----|----------|-----------------------------------------------------------------------------|-------------------------------------------------------|------------|----------------------------------------|---------------|
|     |                                  |    |          |                                                                             | miRNA binding                                         |            |                                        |               |
| 98  | c.1957 G>A<br>(p.Gly653Ser)      | 14 | Missense | Compound heterozygous with c.2251G>T (p.Glu751*)                            | Inactivates protein                                   | INAD       | 1 Chinese                              | 24            |
| 99  | c.1933C>T<br>(p.Arg654*)         | 14 | Nonsense | Homozygous or compound heterozygous with c.1061T>C (p.Leu354Pro)            | Predicted to lead to the nonsense mediated mRNA decay | INAD & DPC | 1 Saudi Arabian & 1 American caucasian | 21, 25        |
| 100 | c.1966C>G<br>(p.Leu656Val)       | 14 | Missense | Heterozygous                                                                | Reduced enzyme activity                               | DPC        | 1 Chinese                              | 23            |
| 101 | c.1970C>T<br>(p.Ala657Val)       | 14 | Missense | Compound heterozygous with c.238G>A (p.Ala80Thr) or c.1771C>T (p.Arg591Trp) | Inactivates protein                                   | INAD       | 4 Chinese                              | 11, 24        |
| 102 | c.1976A>G<br>(p.Asn659Ser)       | 14 | Missense | Heterozygous                                                                | Inactivates protein                                   | DPC        | 1 Taiwanese                            | 20            |
| 103 | c.1978C>A<br>(p.Pro660Thr)       | 14 | Missense | Compound heterozygous with c.719T>C (p.Leu240Pro)                           | Inactivates protein                                   | INAD       | 1 Arabic                               | 9             |
| 104 | c.2030G>T<br>(p.Arg677Leu)       | 15 | Missense | Heterozygous                                                                | Inactivate protein                                    | INAD       | 1 Indian                               | Present study |
| 105 | c.2036G>T<br>(p.Gly679Val)       | 15 | Missense | Heterozygous                                                                | Inactivate protein                                    | DPC        | 1 Chinese                              | 22            |
| 106 | c.2060delT<br>(p.Leu687Profs*16) | 15 | Deletion | Heterozygous                                                                | Premature protein truncation                          | INAD       | 1 Chinese                              | 24            |
| 107 | c.2065A>T<br>(p.Ile689Phe)       | 15 | Missense | Compound heterozygous with c.1117G>A (p.Gly373Arg)                          | Inactivates protein                                   | ANAD       | 1 Chinese                              | 24            |
| 108 | c.2070_2072delT                  | 15 | Deletion | Homozygous or                                                               | Aberrant                                              | INAD &     | 5 Tunisian, 2                          | 1, 3, 4, 30   |

|     |                            |    |          |                                                                                                           |                         |             |                                                           |                            |
|-----|----------------------------|----|----------|-----------------------------------------------------------------------------------------------------------|-------------------------|-------------|-----------------------------------------------------------|----------------------------|
|     | GT<br>(p.Val691del)        |    |          | compound heterozygous with c.1442T>A (p.Leu481Gln) or c.1894C>T (p.Arg632Trp)                             | phospholipase activity  | ANAD        | British, 2 Israeli, 1 American & 1 Libyan                 |                            |
| 109 | c.2077C>G<br>(p.Leu693Val) | 15 | Missense | Heterozygous                                                                                              | Reduced enzyme activity | DPC         | 1 Chinese                                                 | 23                         |
| 110 | c.2132C>T<br>(p.Pro711Leu) | 15 | Missense | Compound heterozygous with c.439G>A (p.Ala147Thr)                                                         | Inactivates protein     | INAD        | 1 British & 1 American                                    | 1, 3                       |
| 111 | c.2215G>C<br>(p.Asp739His) | 16 | Missense | Compound heterozygous with c.1061T>C (p.Leu354Pro)                                                        | Inactivates protein     | ANAD        | 1 British & 1 American                                    | 1, 3                       |
| 112 | c.2218G>A<br>(p.Gly740Arg) | 16 | Missense | Homozygous                                                                                                | Inactivates protein     | ANAD        | 1 Saudi Arabian                                           | 25                         |
| 113 | c.2221C>T<br>(p.Arg741Trp) | 16 | Missense | Homozygous, heterozygous or compound heterozygous with c.1770C>T (p.Asp590Glu) or c.1912G>A (p.Gly638Arg) | Inactivates protein     | INAD        | 2 British, 2 American, 1 Pakistani, 1 Algerian & 1 Indian | 1, 3, 9, 30, Present study |
| 114 | c.2222G>A<br>(p.Arg741Gln) | 16 | Missense | Homozygous                                                                                                | Inactivates protein     | DPC         | 1 Indian                                                  | 5                          |
| 115 | c.2233C>T<br>(p.Arg745Trp) | 16 | Missense | Compound heterozygous with c.1744G>T (p.Val582Leu)                                                        | Inactivates protein     | INAD & ANAD | 1 British & 1 American                                    | 1, 3                       |
| 116 | c.2234G>C<br>(p.Arg745Pro) | 16 | Missense | Homozygous                                                                                                | Inactivates protein     | INAD        | 2 Tunisian                                                | 30                         |
| 117 | c.2239C>T<br>(p.Arg747Trp) | 16 | Missense | Homozygous                                                                                                | Inactivates protein     | DPC         | 1 Pakistani                                               | 5                          |
| 118 | c.2251G>A                  | 16 | Missense | Homozygous                                                                                                | Inactivates             | INAD        | 2 American                                                | 1, 3                       |

|     |                                      |        |             |                                                                                                                    |                              |                  |                                                                                            |                 |
|-----|--------------------------------------|--------|-------------|--------------------------------------------------------------------------------------------------------------------|------------------------------|------------------|--------------------------------------------------------------------------------------------|-----------------|
|     | (p.Glu751Lys)                        |        |             |                                                                                                                    | protein                      |                  | & 1 British                                                                                |                 |
| 119 | c.2251G>T<br>(p.Glu751*)             | 16     | Nonsense    | Compound heterozygous with c.1957 G>A (p.Gly635Ser)                                                                | Premature protein truncation | INAD             | 1 Chinese                                                                                  | 24              |
| 120 | c.2261G>T<br>(p.Gly754Val)           | 16     | Missense    | Compound heterozygous with c.372delC (p.His124Leufs*324)                                                           | Premature protein truncation | ANAD             | 1 Chinese                                                                                  | 24              |
| 121 | c.2339A>G<br>(p.Asn780Ser)           | 17     | Missense    | Heterozygous                                                                                                       | Inactivates protein          | DPC              | 1 German                                                                                   | 17              |
| 122 | c.2341G>A<br>(p.Ala781Thr)           | 17     | Missense    | Heterozygous                                                                                                       | Inactivates protein          | DPC              | 1 German                                                                                   | 17              |
| 123 | IVS16+1G>A                           | IVS 16 | Splice site | Homozygous                                                                                                         | Aberrant splicing            | INAD             | 1 British, 1 Italian & 1 American                                                          | 1, 3, 7         |
| 124 | c.2491_2500del<br>(p.Glu786Serfs*29) | 17     | Deletion    | Homozygous                                                                                                         | Premature protein truncation | INAD             | 1 Tunisian                                                                                 | 30              |
| 125 | c.2370T>G<br>(p.Tyr790*)             | 17     | Nonsense    | Homozygous, heterozygous or compound heterozygous with c.691G>C (p.Gly231Arg) or c.1442T>A (p.Leu481Gln)           | Premature protein truncation | INAD, ANAD & DPC | 4 Caucasian of western European descent, 4 American, 1 British, 1 Portuguese & 1 Caucasian | 1, 3, 8, 21, 28 |
| 126 | c.2370_2371delTG<br>(p.Tyr790*)      | 17     | Deletion    | Homozygous or compound heterozygous with c.238G>A (p.Ala80Thr), IVS5 - 1G>T or c.1538_1541delACTG (p.Asp513fs*543) | Premature protein truncation | INAD & ANAD      | 2 British & 3 American                                                                     | 1, 3            |
| 127 | c.2375A>C<br>(p.His792Pro)           | 17     | Missense    | Homozygous                                                                                                         | Inactivates protein          | INAD             | 1 Pakistani                                                                                | 28              |

|     |                            |    |          |              |                                    |      |                                                      |            |
|-----|----------------------------|----|----------|--------------|------------------------------------|------|------------------------------------------------------|------------|
| 128 | c.2389C>T<br>(p.Gln797*)   | 17 | Nonsense | Heterozygous | Premature<br>protein<br>truncation | INAD | 1 Chinese                                            | 24         |
| 129 | c.2417C>G<br>(p.Pro806Arg) | 17 | Missense | Heterozygous | Inactivates<br>protein             | DPC  | 12 Japanese,<br>1<br>Singaporean<br>& 1<br>Taiwanese | 13, 19, 20 |
